# Supplementary material
Source: Springer Nature journal article supplement (https://www.springermedizin.de/resource/supplementary/12874_2013_1005_MOESM4_ESM.pdf/9433022)
Supplement: MOESM4 [file 9433022]

“Does bar-based, peer-led sexual health promotion have a community-level effect amongst gay men in Scotland?”

**Abstract: *Gay Men's Task Force in Glasgow...***[INCLUDE]

“Good in parts: the ***Gay Men's Task Force in Glasgow***--a response to Kelly”,[UNSURE]

“Good in parts: the ***Gay Men's Task Force in Glasgow***--a response to Kelly”, [INCLUDE]
